# Supplementary figures and images for: Crystal structure and physical properties of the new silicide Hf4CuSi4 with planar CuSi4 rectangles
Source: Royal Society of Chemistry journal article supplement (doi:10.1039/c0jm00066c), 2010-01-01

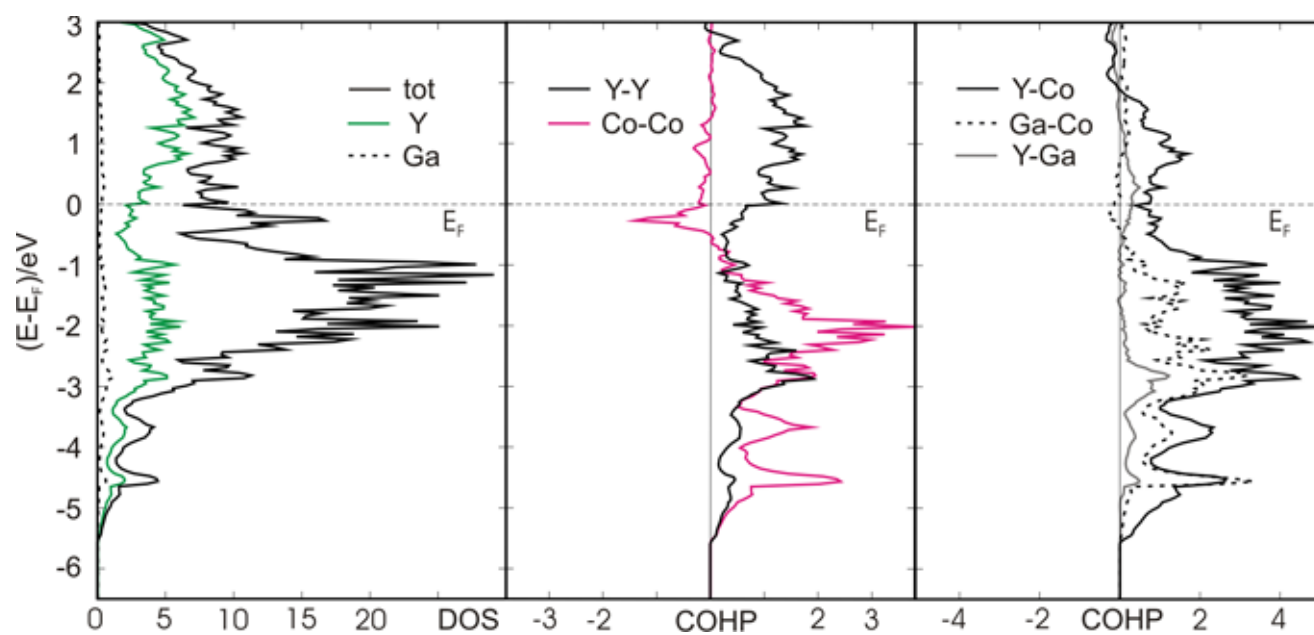

**Fig. S1** Densities of states (left) and selected cumulated COHP curves of  $\text{Y}_4\text{GaCo}_4$ .

Supplement: c0jm00066c.pdf [file c0jm00066c.pdf]
